# Supplementary material for: A New Membrane Protein Sbg1 Links the Contractile Ring Apparatus and Septum Synthesis Machinery in Fission Yeast
Source: PubMed Central journal article supplement (PMC5066963; doi:10.1371/journal.pgen.1006383), 2016-10-17
Supplement: pgen.1006383.s007.pdf [file pgen.1006383.s007.pdf]

**Table S3: S. pombe strains**

|          |                                                                                                                                                                                                                               |                |
|----------|-------------------------------------------------------------------------------------------------------------------------------------------------------------------------------------------------------------------------------|----------------|
| MBY 102  | <i>ade6-M210 ura4-Δ18 leu1-32 h<sup>+</sup></i>                                                                                                                                                                               | Lab collection |
| MBY 103  | <i>ade6-M216 ura4-Δ18 leu1-32 h<sup>-</sup></i>                                                                                                                                                                               | Lab collection |
| MBY 192  | <i>ura4-Δ18 leu1-32 h<sup>-</sup></i>                                                                                                                                                                                         | Lab collection |
| MBY 737  | <i>imp2Δ::ura4<sup>+</sup> leu1-32 ade6-M216 h<sup>+</sup></i>                                                                                                                                                                | Lab collection |
| MBY 977  | <i>clp1Δ::ura4<sup>+</sup> ura4-Δ18 leu1-32 h<sup>+</sup></i>                                                                                                                                                                 | Lab collection |
| MBY 1148 | <i>cps1-191 ade6-M21x ura4-Δ18 leu1-32 h<sup>+</sup></i>                                                                                                                                                                      | Lab collection |
| MBY 5730 | <i>cps1-191 rlc1<sup>+</sup>-gfp::ura<sup>+</sup> pcp1<sup>+</sup>-gfp:KanMX6</i>                                                                                                                                             | Lab collection |
| MBY 5732 | <i>rlc1<sup>+</sup>-gfp::ura<sup>+</sup> pcp1<sup>+</sup>-gfp:KanMX6 h<sup>-</sup></i>                                                                                                                                        | Lab collection |
| MBY 6128 | <i>ade5Δ ade7Δ::ade5<sup>+</sup> his5Δ leu1-32 ura4-Δ18 h<sup>-</sup></i>                                                                                                                                                     | Lab collection |
| MBY 8558 | <i>ura4-Δ18 leu1-32 with pEmpty h<sup>-</sup></i>                                                                                                                                                                             | Lab collection |
| MBY 8674 | <i>ags1Δ 3'UTR<sub>ags1+</sub>::ags1<sup>+</sup>-GFP:leu1<sup>+</sup>:ura4<sup>+</sup><br/>bgs1Δ::ura4<sup>+</sup> P<sub>bgs1+</sub>::3XHA-bgs1<sup>+</sup>:leu1<sup>+</sup> leu1-32<br/>ura4-Δ18 ade6-M21X h<sup>+</sup></i> | Lab collection |
| MBY 8702 | <i>P<sub>bgs1+</sub>::3XHA-bgs1<sup>+</sup>:leu1<sup>+</sup> bgs1Δ::ura4<sup>+</sup> leu1-32<br/>ura4-Δ18 h<sup>+</sup></i>                                                                                                   | Lab collection |
| MBY 8865 | <i>leu1-32 ura4-Δ18 his3-Δ1 bgs1Δ::ura4<sup>+</sup><br/>P<sub>bgs1+</sub>::GFP-bgs1<sup>+</sup>:leu1<sup>+</sup> h<sup>-</sup></i>                                                                                            | Lab collection |
| MBY 8944 | <i>cps1-191 ade6-M21x ura4-Δ18 leu1-32 with<br/>pEmpty h<sup>+</sup></i>                                                                                                                                                      | This study     |
| MBY 8946 | <i>cps1-191 ade6-M21x ura4-Δ18 leu1-32 with<br/>pSbg1 h<sup>+</sup></i>                                                                                                                                                       | This study     |
| MBY 8947 | <i>cps1-191 ade6-M21x ura4-Δ18 leu1-32 with<br/>pCps1 h<sup>+</sup></i>                                                                                                                                                       | This study     |
| MBY 8967 | <i>Hyg<sup>r</sup>:eGFP-sbg1<sup>+</sup> ura4-Δ18 leu1-32 h<sup>-</sup></i>                                                                                                                                                   | This study     |
| MBY 8977 | <i>Hyg<sup>r</sup>:eGFP-sbg1<sup>+</sup> mCherry-atb2<sup>+</sup>:hph leu1-32<br/>ura4-Δ18 h<sup>+</sup></i>                                                                                                                  | This study     |
| MBY 9006 | <i>Hyg<sup>r</sup>:eGFP-sbg1<sup>+</sup> P<sub>bgs1+</sub>::tdTom-12A-<br/>bgs1<sup>+</sup>:leu1<sup>+</sup> bgs1Δ::ura4<sup>+</sup> leu1-32 ura4-Δ18<br/>his3-Δ1</i>                                                         | This study     |
| MBY 9085 | <i>h<sup>+</sup>/h<sup>+</sup> sbg1Δ:kanMX/sbg1<sup>+</sup> ade6-M210/ade6-<br/>M216 ura4-D18/ura4-Δ18 leu1-32/leu1-32</i>                                                                                                    | Bioneer Korea  |
| MBY 9086 | <i>h<sup>+</sup>/h<sup>-</sup> sbg1Δ:kanMX/sbg1<sup>+</sup> ade6-M210/ade6-<br/>M216 ura4-Δ18/ura4-Δ18 leu1-32/leu1-32</i>                                                                                                    | This study     |
| MBY 9097 | <i>cps1-191 Hyg<sup>r</sup>:eGFP-sbg1<sup>+</sup> ura4-Δ18 leu1-32<br/>h<sup>-</sup></i>                                                                                                                                      | This study     |
| MBY 9156 | <i>h<sup>+</sup>/h<sup>-</sup> sbg1Δ:kanMX/sbg1<sup>+</sup> mCherry-atb2<sup>+</sup>:hph<br/>rlc1<sup>+</sup>-3GFP::kanMx ade6-M210/ade6-M216<br/>ura4-Δ18/ura4-Δ18</i>                                                       | This study     |

|           |                                                                                                                                                                                                                           |            |
|-----------|---------------------------------------------------------------------------------------------------------------------------------------------------------------------------------------------------------------------------|------------|
| MBY 9160  | <i>h<sup>+</sup>/h<sup>-</sup> sbg1Δ:kanMX/sbg1<sup>+</sup> mCherry-atb2<sup>+</sup>:hph bgs1Δ::ura4<sup>+</sup> P<sub>bgs1+</sub>::GFP-bgs1 ade6-M210/ade6-M216</i>                                                      | This study |
| MBY 9188  | <i>P<sub>bgs1+</sub>::GFP-12A- cps1-191:leu1<sup>+</sup> bgs1Δ::ura4<sup>+</sup> leu1-32 ura4-Δ18 his3-Δ1 with pEmpty_his3 h<sup>-</sup></i>                                                                              | This study |
| MBY 9193  | <i>P<sub>bgs1+</sub>::GFP-12A- cps1-191: leu1<sup>+</sup> bgs1Δ:: ura4<sup>+</sup> leu1-32 ura4-Δ18 his3-Δ1 with pSbg1_his3 h<sup>-</sup></i>                                                                             | This study |
| MBY 9198  | <i>his5Δ ura4-Δ18 leu1-32 ade5Δ ade7Δ::ade5<sup>+</sup> sbg1:his5cd:ura4<sup>+</sup> h<sup>-</sup></i>                                                                                                                    | This study |
| MBY 9241  | <i>Hyg<sup>r</sup>:eGFP-sbg1<sup>+</sup> leu1-32 ura4-Δ18 bgs1Δ::ura4<sup>+</sup> P<sub>bgs1+</sub>:3XHA-bgs1<sup>+</sup>:leu1<sup>+</sup> h<sup>-</sup></i>                                                              | This study |
| MBY 9285  | <i>cps1-191 ura4-Δ18 leu1-32 his3-Δ1 with pmCherry-Sbg1</i>                                                                                                                                                               | This study |
| MBY 9358  | <i>sbg1-3:his5<sup>+</sup>:ura4<sup>+</sup> clp1Δ::ura4 leu1-32 ura4-Δ18 his3-Δ1 his5Δ ade5Δ ade7Δ::ade5<sup>+</sup> h<sup>-</sup></i>                                                                                    | This study |
| MBY 9359  | <i>sbg1-3:his5<sup>+</sup>:ura4<sup>+</sup> his5Δ ura4-Δ18 leu1-32 ade5Δ ade7Δ::ade5<sup>+</sup> h<sup>-</sup></i>                                                                                                        | This study |
| MBY 9366  | <i>sbg1-3:his5<sup>+</sup>:ura4<sup>+</sup> his5Δ ura4-Δ18 leu1-32 ade5Δ ade7Δ::ade5<sup>+</sup> with pBgs1 h<sup>-</sup></i>                                                                                             | This study |
| MBY 9370  | <i>sbg1-3:his5<sup>+</sup>:ura4<sup>+</sup> his5Δ ura4-Δ18 leu1-32 ade5Δ ade7Δ::ade5<sup>+</sup> with pSbg1 h<sup>-</sup></i>                                                                                             | This study |
| MBY 9372  | <i>sbg1-3:his5<sup>+</sup>:ura4<sup>+</sup> his5Δ ura4-Δ18 leu1-32 ade5Δ ade7Δ::ade5<sup>+</sup> with pEmpty h<sup>-</sup></i>                                                                                            | This study |
| MBY 9389  | <i>Hyg<sup>r</sup>-eGFP-sbg1-3:his5<sup>+</sup>:ura4<sup>+</sup> rlc1<sup>+</sup>-tdTomato-NatMX6 pcp1<sup>+</sup>-mCherry:ura4<sup>+</sup> h<sup>-</sup></i>                                                             | This study |
| MBY 9390  | <i>sbg1-3:his5<sup>+</sup>:ura4<sup>+</sup> bgs1Δ::ura4<sup>+</sup> P<sub>bgs1+</sub>::GFP-bgs1<sup>+</sup>:leu1<sup>+</sup> rlc1<sup>+</sup>-tdTomato-NatMX6 pcp1<sup>+</sup>-mCherry:ura4<sup>+</sup> h<sup>+</sup></i> | This study |
| MBY 9400  | <i>sbg1-3:his5<sup>+</sup>:ura4<sup>+</sup> imp2Δ::ura4<sup>+</sup></i>                                                                                                                                                   | This study |
| MBY 9432  | <i>Hyg<sup>r</sup>-eGFP-sbg1<sup>+</sup> rlc1<sup>+</sup>-tdTomato-NatMX6 pcp1<sup>+</sup>-mCherry:ura4<sup>+</sup> h<sup>+</sup></i>                                                                                     | This study |
| MBY 9448  | <i>sbg1-3:his5<sup>+</sup>:ura4<sup>+</sup> pxl1Δ::KanMX6 GFP-pxl1<sup>+</sup>:leu1<sup>+</sup> rlc1<sup>+</sup>-tdtomato-NatMX6 pcp1<sup>+</sup>-mcherry:ura4<sup>+</sup> leu1-32 ura4-Δ18 h<sup>-</sup></i>             | This study |
| MBY 9454  | <i>cps1-191 rlc1<sup>+</sup>-gfp:ura<sup>+</sup> pcp1<sup>+</sup>-gfp:KanMX6 with pEmpty h<sup>+</sup></i>                                                                                                                | This study |
| MBY 9456  | <i>cps1-191 rlc1<sup>+</sup>-gfp:ura<sup>+</sup> pcp1<sup>+</sup>-gfp:KanMX6 with pSbg1 h<sup>+</sup></i>                                                                                                                 | This study |
| MBY 9472  | <i>cps1-191 ade6-M21x ura4-Δ18 leu1-32 with pSbg1-TMΔ h<sup>+</sup></i>                                                                                                                                                   | This study |
| MBY 9485  | <i>sbg1-3:his5<sup>+</sup>:ura4<sup>+</sup> rga7<sup>+</sup>-GFP:KanMX6 rlc1<sup>+</sup>-tdTomato-NatMX6 pcp1<sup>+</sup>-mCherry::ura4<sup>+</sup> h<sup>-</sup></i>                                                     | This study |
| MBY 9493  | <i>rlc1<sup>+</sup>-gfp:ura<sup>+</sup> pcp1<sup>+</sup>-gfp:KanMX6 with pEmpty h<sup>-</sup></i>                                                                                                                         | This study |
| MBY 9508  | <i>rlc1<sup>+</sup>-gfp:ura<sup>+</sup> pcp1<sup>+</sup>-gfp:KanMX6 with pSbg1 h<sup>-</sup></i>                                                                                                                          | This study |
| MBY 11106 | <i>h<sup>+</sup>/h<sup>-</sup> sbg1Δ:kanMX/sbg1<sup>+</sup> bgs1Δ::ura4<sup>+</sup> P<sub>bgs1+</sub>::GFP-bgs1 ade6-M210/ade6-M216 ura4-Δ18/ ura4-Δ18 leu1-32/leu1-32</i>                                                | This study |
