# Supplementary material for: A New Membrane Protein Sbg1 Links the Contractile Ring Apparatus and Septum Synthesis Machinery in Fission Yeast
Source: PubMed Central journal article supplement (PMC5066963; doi:10.1371/journal.pgen.1006383), 2016-10-17
Supplement: pgen.1006383.s008.pdf [file pgen.1006383.s008.pdf]

**Table S4: Yeast strains used for two hybrid analysis**

|        |                                                                                                                                       |                     |
|--------|---------------------------------------------------------------------------------------------------------------------------------------|---------------------|
| SGY37  | <i>MAT<math>\alpha</math> leu2 ADE2 ura3-52::URA3-lexA-op-LacZ his3 trp1</i>                                                          | Geissler et al. [6] |
| YPH500 | <i>MAT<math>\alpha</math> ura3-52 lys2-801 ade2-101 trp1<math>\Delta</math>63 his3<math>\Delta</math>200 leu2<math>\Delta</math>1</i> | Sikorski et al. [7] |
