# Supplementary material for: A New Membrane Protein Sbg1 Links the Contractile Ring Apparatus and Septum Synthesis Machinery in Fission Yeast
Source: PubMed Central journal article supplement (PMC5066963; doi:10.1371/journal.pgen.1006383), 2016-10-17
Supplement: pgen.1006383.s009.pdf [file pgen.1006383.s009.pdf]

**Table S5: Plasmids used in this study**

|          |                                                                             |
|----------|-----------------------------------------------------------------------------|
| pCDL1522 | <i>pHyg<sup>r</sup>-eGFP:Amp<sup>r</sup></i>                                |
| pCDL1000 | <i>pAL-KS-empty</i> (referred to as pEmpty)                                 |
| pCDL1542 | <i>phis5cd:ura4<sup>+</sup></i>                                             |
| pCDL1456 | <i>phis5c<sup>+</sup></i>                                                   |
| pCDL1673 | <i>psbg1<sup>+</sup>:his5c<sup>+</sup></i>                                  |
| pCDL1687 | <i>pFA6a-mCherry-NatMX6</i>                                                 |
| pBac5    | <i>pAL-KS-sbg1<sup>+</sup></i> (referred to as pSbg1)                       |
| pBac14   | <i>pAL-KS-sbg1-TMΔ</i> (referred to as pSbg1-TMΔ)                           |
| pBac15   | <i>pAL-KS-bgs1<sup>+</sup></i> (referred to as pBgs1)                       |
| pBac6    | <i>pAL-KS-empty:his3<sup>+</sup></i> (referred to as pEmpty_his3)           |
| pBac7    | <i>pAL-KS-sbg1<sup>+</sup>:his3<sup>+</sup></i> (referred to as pSbg1_his3) |
| pBac9    | <i>pAL-KS-mCherry-sbg1<sup>+</sup>:his3<sup>+</sup></i>                     |
| pMM5     | <i>pRS423-Gal1-LexA-MYC</i>                                                 |
| pMM6     | <i>pRS425-Gal1-Gal4-HA</i>                                                  |
