# Supplementary material for: A New Membrane Protein Sbg1 Links the Contractile Ring Apparatus and Septum Synthesis Machinery in Fission Yeast
Source: PubMed Central journal article supplement (PMC5066963; doi:10.1371/journal.pgen.1006383), 2016-10-17
Supplement: pgen.1006383.s010.pdf [file pgen.1006383.s010.pdf]

**Table S6: Primers**

|             |                                               |
|-------------|-----------------------------------------------|
| MOH<br>1207 | AATTAACCCTCACTAAAGGG                          |
| MOH<br>1208 | GTAATACGACTCACTATAGGGC                        |
| MOH<br>6061 | TATACGCGACATGGCGCGCG                          |
| MOH<br>6062 | CGGTGAGTTCAGGCTTTTTCATTTTTCTAATTAGTACTCTGCCTC |
| MOH<br>6063 | GAGGCAGAGTACTAATTAGAAAAATGAAAAAGCCTGAACTCACCG |
| MOH<br>6064 | AGTCTATAGGTGACTGAGACATCTTGTACAGCTCGTCCATGCCGA |
| MOH<br>6065 | TCGGCATGGACGAGCTGTACAAGATGTCTCAGTCACCTATAGACT |
| MOH<br>6066 | TTTCTTCCTTTGCTTTTCTACTT                       |
| K150        | GATAATGAATTGAATTACGAGTTGGCTAACGAAGTTTCA       |
| K151        | TTTCTACTTCCAAAATATTTACAAATCCACGCAAAGTAAAA     |
| K152        | AAATATTTTGGAAAGTAGAAAAGCAAAGGAAGAAAAACTGA     |
| K153        | GGTCATTAGTTAAATGACTCGTATTTGCGAAA              |
| K47         | GGATGGTCGACGTTCAATCTCTAAATCTTTCA              |
| K48         | ATCCACAACCTCAGCTGAGAACGGAGCTTACTCATCCAA       |
| K49         | GCTCCGTTCTCAGCTGAGTTGTGGATTGTTAATGCTTT        |

|      |                                                                                        |
|------|----------------------------------------------------------------------------------------|
| K50  | AAGCACAACTAGTTGAAGGCAGTCG                                                              |
| K140 | TACATTATACGAAGTCGACAGCTGAATTCTCGAGTGCTAGCGGATCCCGATA<br>TCAGGTGATTGGTATTTTATTTTCGGCTGA |
| K141 | GTTTTGTTCACTTATTTAAATAGATCTATAACTTCGTATAATGTATGCTATACG<br>ATTTGAAGGCAGTCGGTTAGACGAAAT  |
| K154 | AGAGTACTAATTAGAAAAAATGGTGAGCAAGGGCGAGGA                                                |
| K155 | TCTATAGGTGACTGAGACATCTTGTACAGCTCGTCCATGCCG                                             |
| K185 | GACGAAGCTCTTTCTAGAAGCGTAGT                                                             |
| K186 | GGTGATTGGTATTTTATTTTCGGCTGA                                                            |
